# Supplementary material
Source: PubMed Central journal article supplement (PMC4157316)
Supplement: NIHMS617191-supplement-1.pdf [file NIHMS617191-supplement-1.pdf]

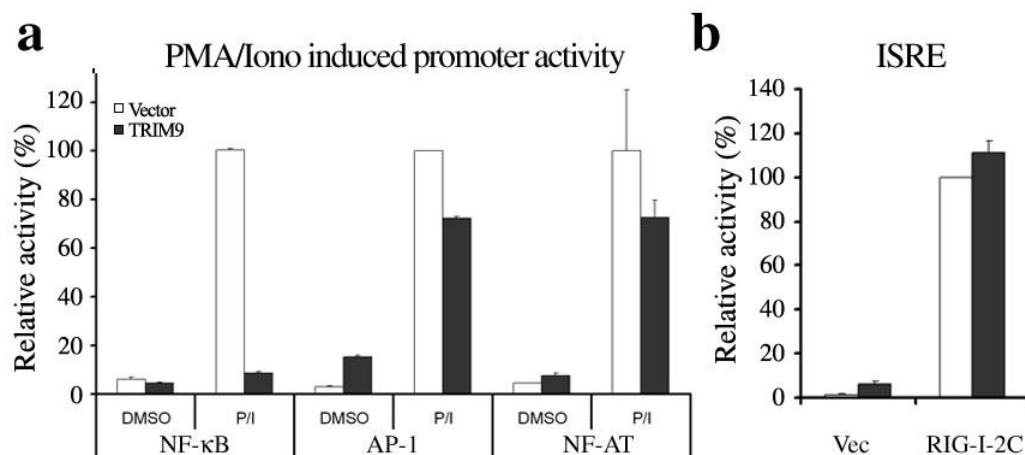

**Supplementary Figure 1. TRIM9 does not affect AP-1, NF-AT or ISRE activity.** (a,b) At 24h post-transfection with TRIM9 or vector and indicated reporter luciferase constructs, HEK293T cells were stimulated with PMA/Ionomycin (P/I) for 16h **(a)** or transfected together with RIG-I-2CARD **(b)** and cell lysates were then used for dual-luciferase assay. Data (mean and s.e.m.) are representative of at least three independent experiments.

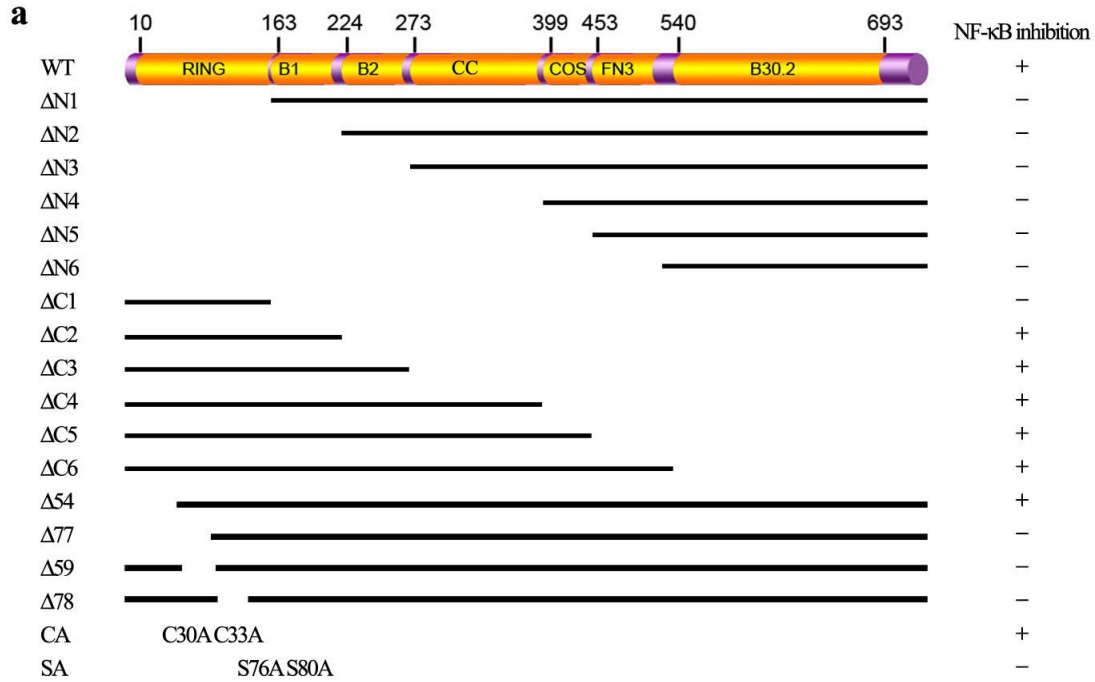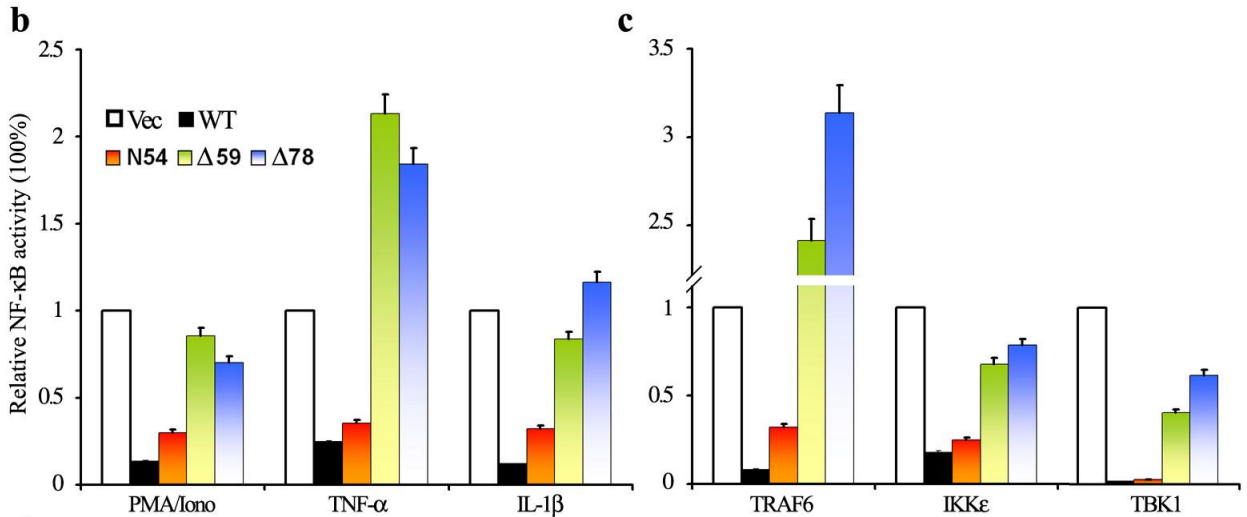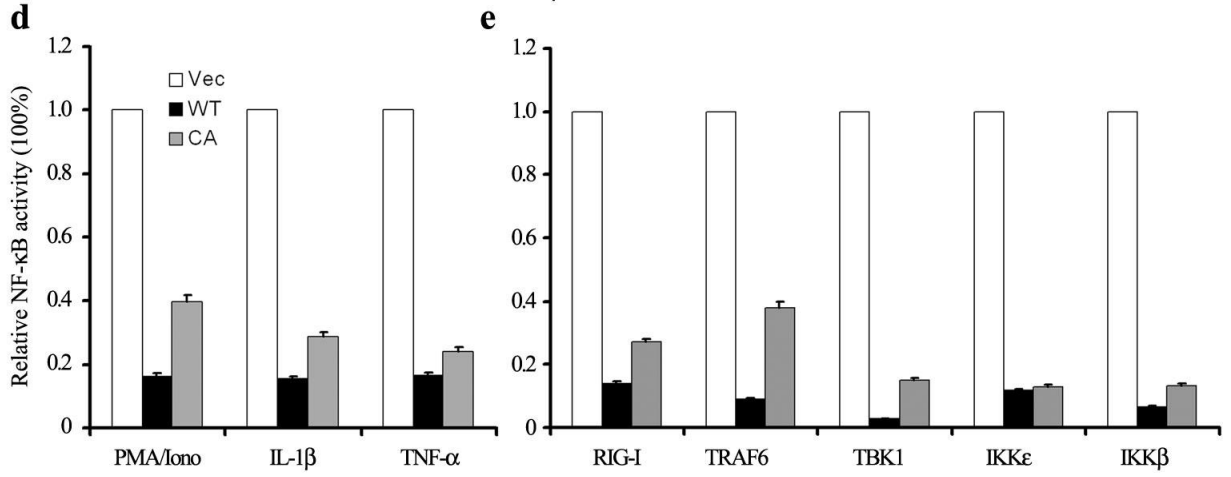

**Supplementary Figure 2. The N-terminal of TRIM9 is critical for the NF- $\kappa$ B inhibition. (a)**

Schematic diagram of TRIM9 mutants and summary of their NF- $\kappa$ B inhibition ability.

**(b, c)** HEK293T cells were transfected with NF- $\kappa$ B reporter, TK-Renilla reporter and TRIM9 WT or its mutant for 24h, followed by treatment with PMA/Ionomycin, TNF- $\alpha$  or IL-1 $\beta$  for 16h **(b)** or together with TRAF6, IKK $\epsilon$  or TBK1 **(c)**. Cell lysates were used for dual-luciferase assay **(d, e)** HEK293T cells were transfected with NF- $\kappa$ B reporter, TK-Renilla reporter and TRIM9 WT or its CA (C30A C33A) mutant for 24h, followed by treatment with PMA/Ionomycin, TNF- $\alpha$  or IL-1 $\beta$  for 16h **(d)** or together with RIG-I (2 CARD), TRAF6, TBK1, IKK $\epsilon$  or IKK $\beta$  **(e)**. Cell lysates were used for dual-luciferase assay. Data (mean and s.e.m.) are representative of at least three independent experiments.

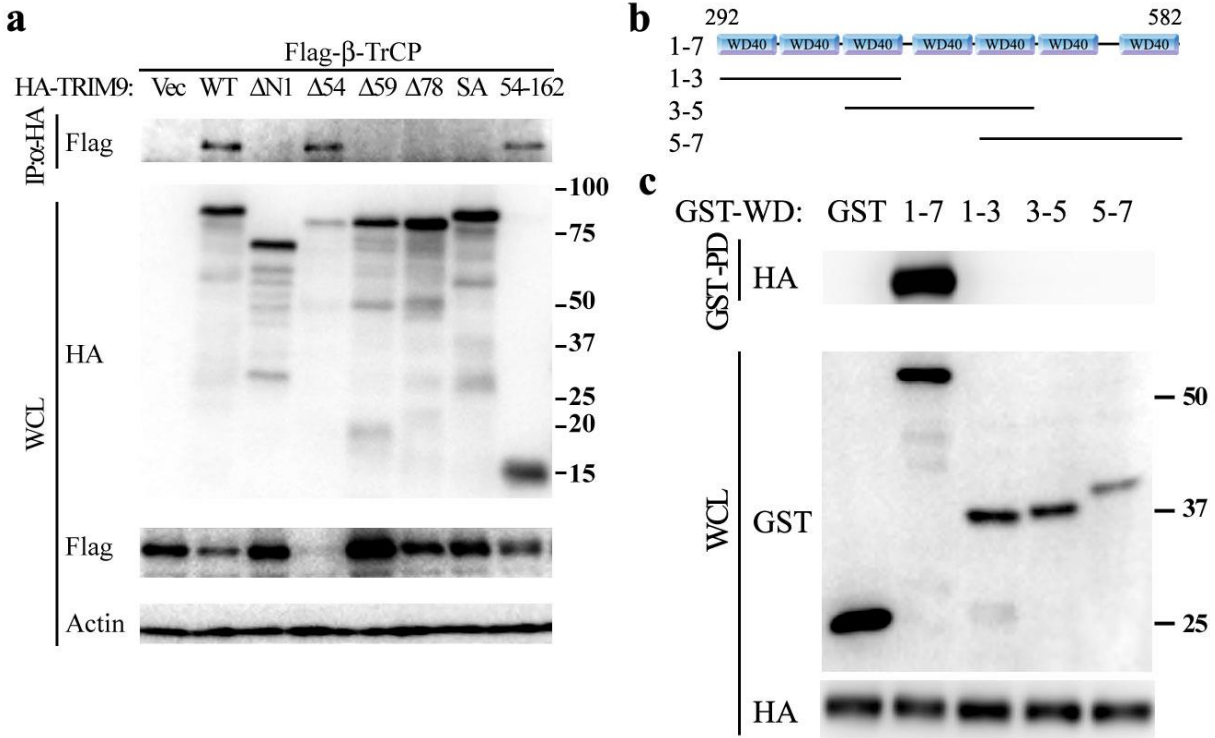

**Supplementary Figure 3. The C-terminal 7 WD40 motifs of TrCP are required for TRIM9 binding.** (a) At 48h posttransfection with Flag- $\beta$ -TrCP together with HA-TRIM9 WT or its mutants, HEK293T cells were used for IP and IB with the indicated antibodies. (b) Schematic diagram of the GST- $\beta$ -TrCP WD40 (1-7) repeats and deletion mutants. (c) At 48h posttransfection with mammalian GST-TrCP C-terminal fusion construct and HA-TRIM9, HEK293T cell lysates were subjected to GST-Pull-down (PD) and IB analysis. The data are representative of three independent experiments.

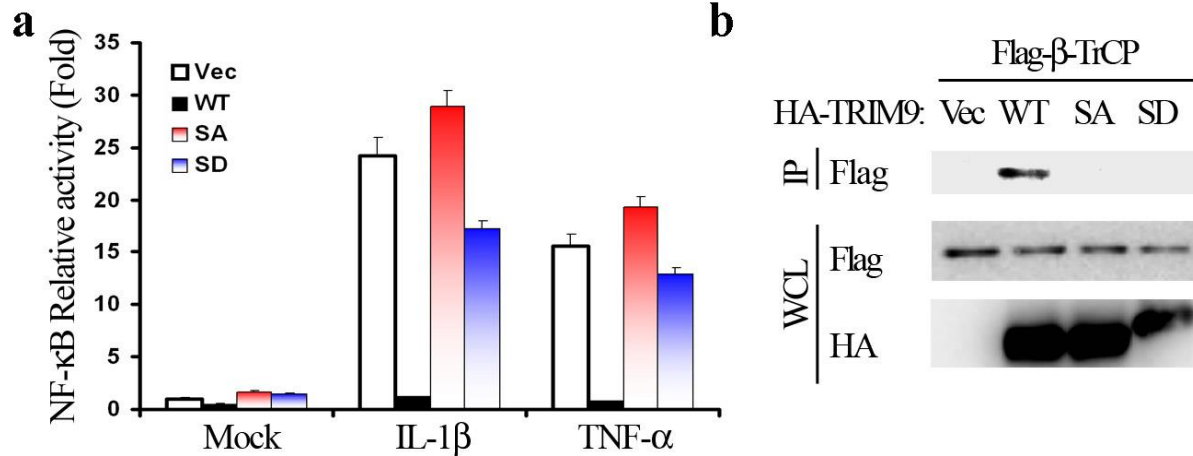

**Supplementary Figure 4. Both SA, and SD mutant fail to bind  $\beta$ -TrCP and to inhibit NF- $\kappa$ B activity.** (a) HEK293T cells were transfected with NF- $\kappa$ B reporter, TK-Renilla reporter and TRIM9 WT SA or SD mutant for 24h, followed by stimulation with mock, IL-1 $\beta$  or TNF- $\alpha$ . Cell lysates were used for dual-luciferase assay. (b) At 48h post transfection with Flag- $\beta$ -TrCP and HA-TRIM9 WT, SA or SD mutant, HEK293T cell lysates were subjected to IP and IB analysis. Data (mean and s.e.m.) are representative of at least three independent experiments.

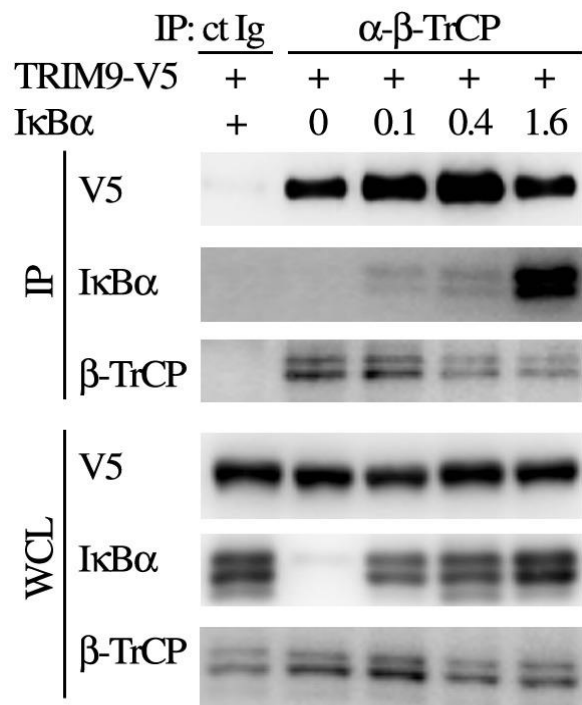

**Supplementary Figure 5. I $\kappa$ B $\alpha$  does not compete with TRIM9 for  $\beta$ -TrCP binding.** At 48h post transfection with Flag- $\beta$ -TrCP and V5-TRIM9 and increasing amounts of I $\kappa$ B $\alpha$  (0-1.6  $\mu$ g), HEK293T cell lysates were used for IP with anti- $\beta$ -TrCP, followed by IB with anti-I $\kappa$ B $\alpha$ , anti- $\beta$ -TrCP or anti-V5 antibody. The data are representative of three independent experiments.

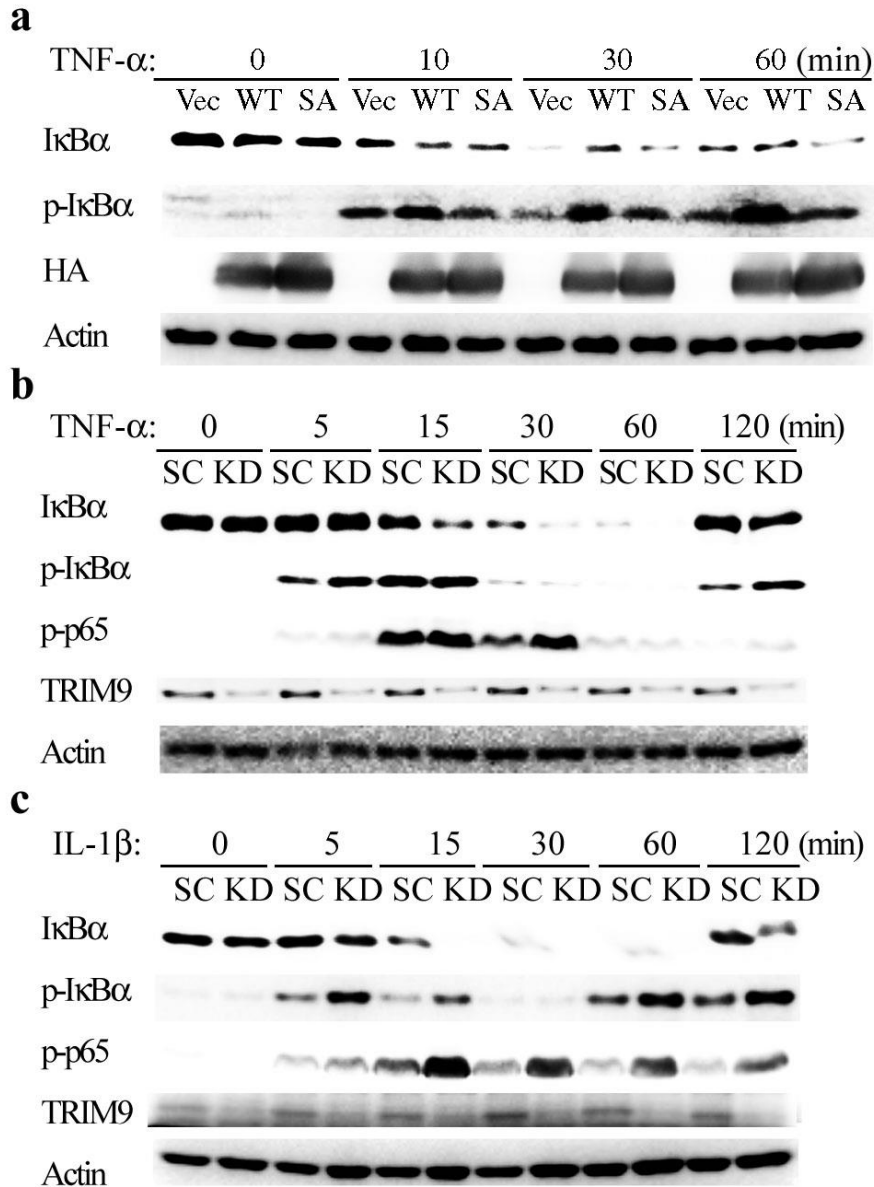

**Supplementary Figure 6. TRIM9 suppresses I $\kappa$ B $\alpha$  degradation and p65 phosphorylation. (a)** At 24 h posttransfection with TRIM9 or its SA mutant, HEK293T cells were stimulated with TNF- $\alpha$  for indicated times (min) and cell lysates were used for IB with the indicated antibodies. **(b and c)** A549 cells carrying lentivirus containing scrambled shRNA (SC) or TRIM9-specific shRNA (KD) were stimulated with TNF- $\alpha$  or IL-1 $\beta$  for indicated times and cell lysates were then used for IB with the indicated antibodies. The data are representative of three independent experiments.

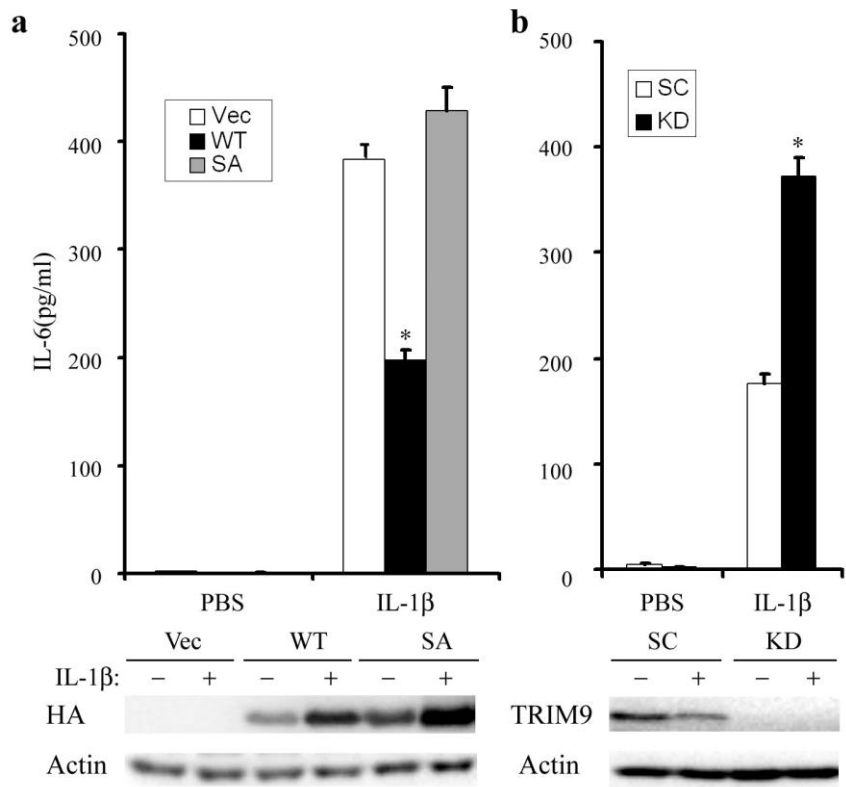

**Supplementary Figure 7. TRIM9 inhibited IL-6 production in SK-N-AS cells.** (a,b) SK-N-AS cells stably expressing vector, TRIM9 wt or SA mutant (a) or carrying lentivirus containing scrambled shRNA (SC) or TRIM9-specific shRNA (KD) (b) were stimulated with PBS or IL-1 $\beta$  for 16 hrs and their supernatants were used for IL-6 ELISA. TRIM9 expressions were analyzed by IB (lower panel). The mean $\pm$ s.d. is shown: \* $p$ <0.05. The data are representative of three independent experiments.



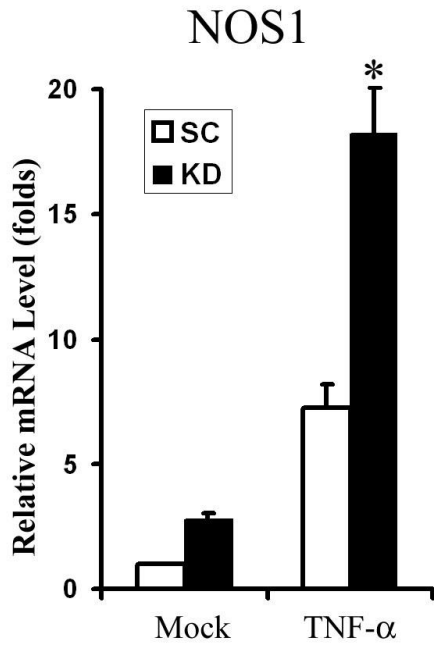

**Supplementary Figure 8. Q-PCR analysis for NOS1 mRNA levels of primary neuron cells.**

At 48h post infection with scramble (SC) lentivirus or TRIM9-specific shRNA lentivirus, primary rat neuron cells were stimulated with TNF- $\alpha$  for 2h, followed by Q-PCR analysis for NOS1 mRNA levels. The mean $\pm$ s.d. is shown: \*p<0.05, The data are representative of three independent experiments. .

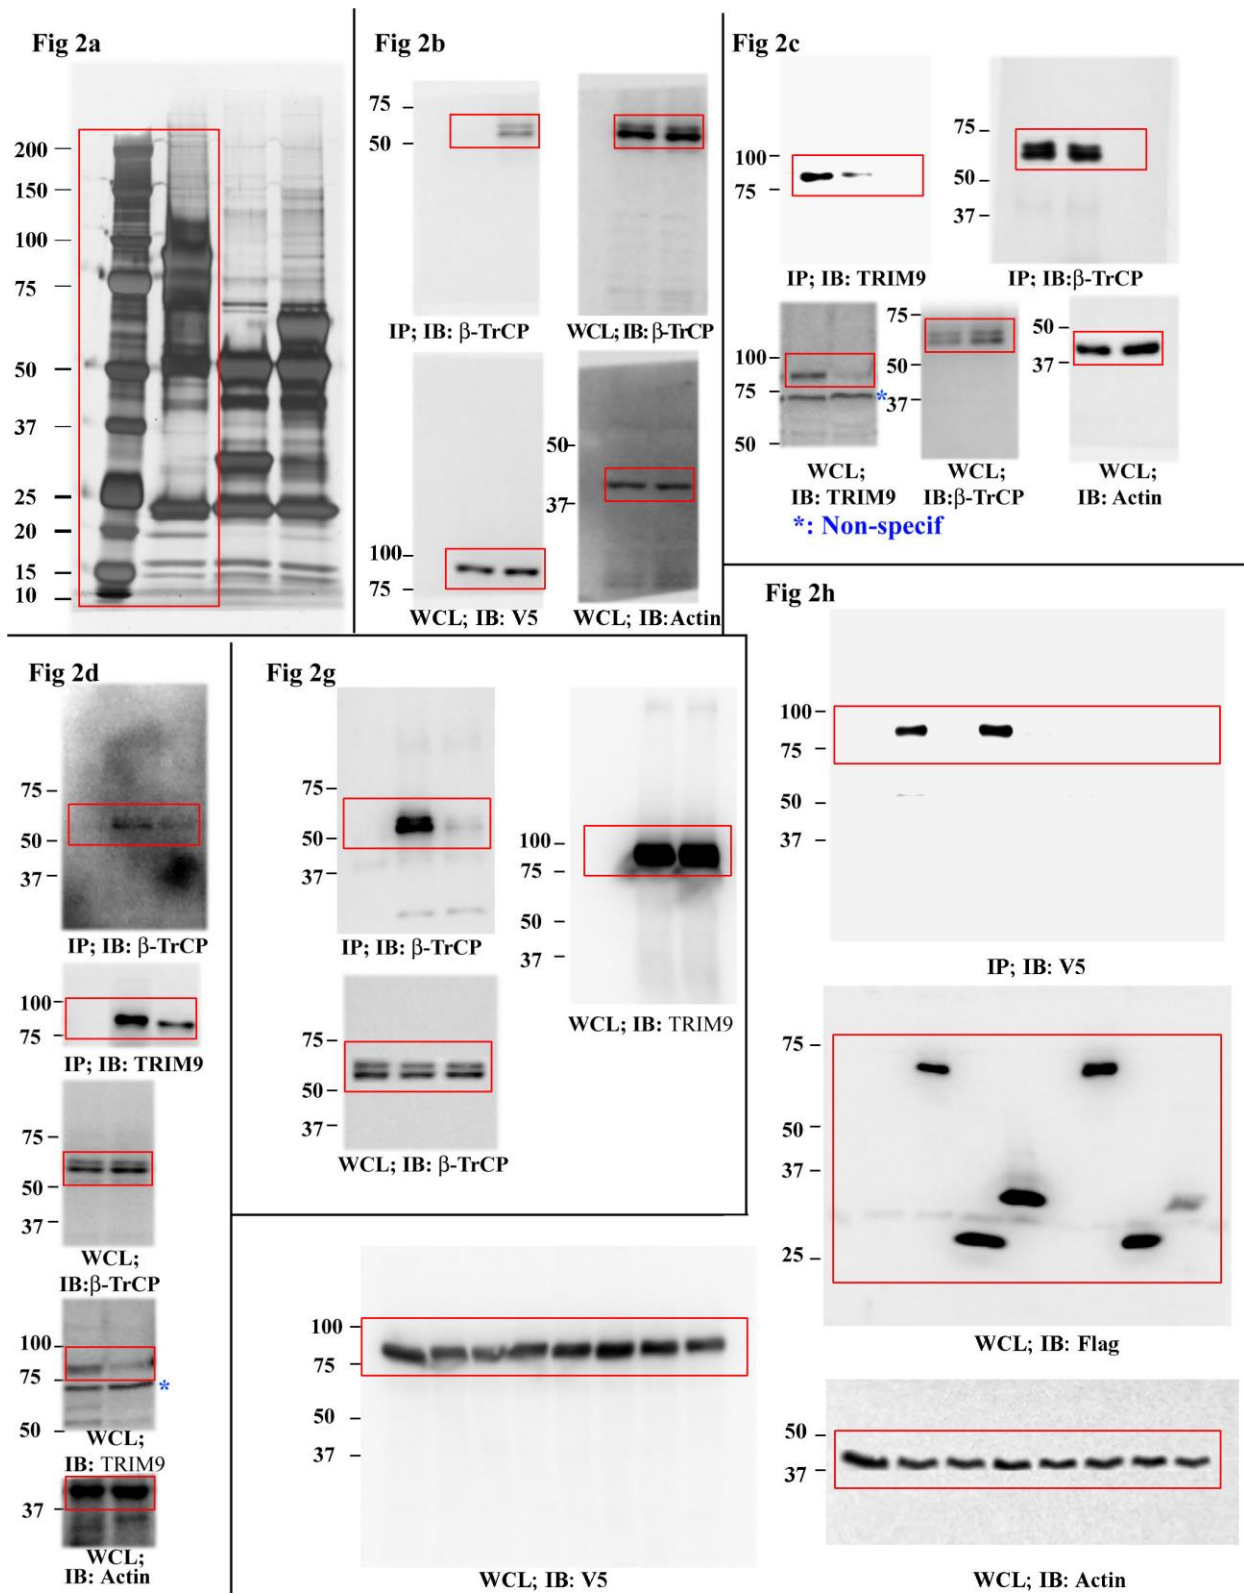

**Supplementary Figure 9.**

Full scan image of the Western blots used in the manuscript for Fig 2.

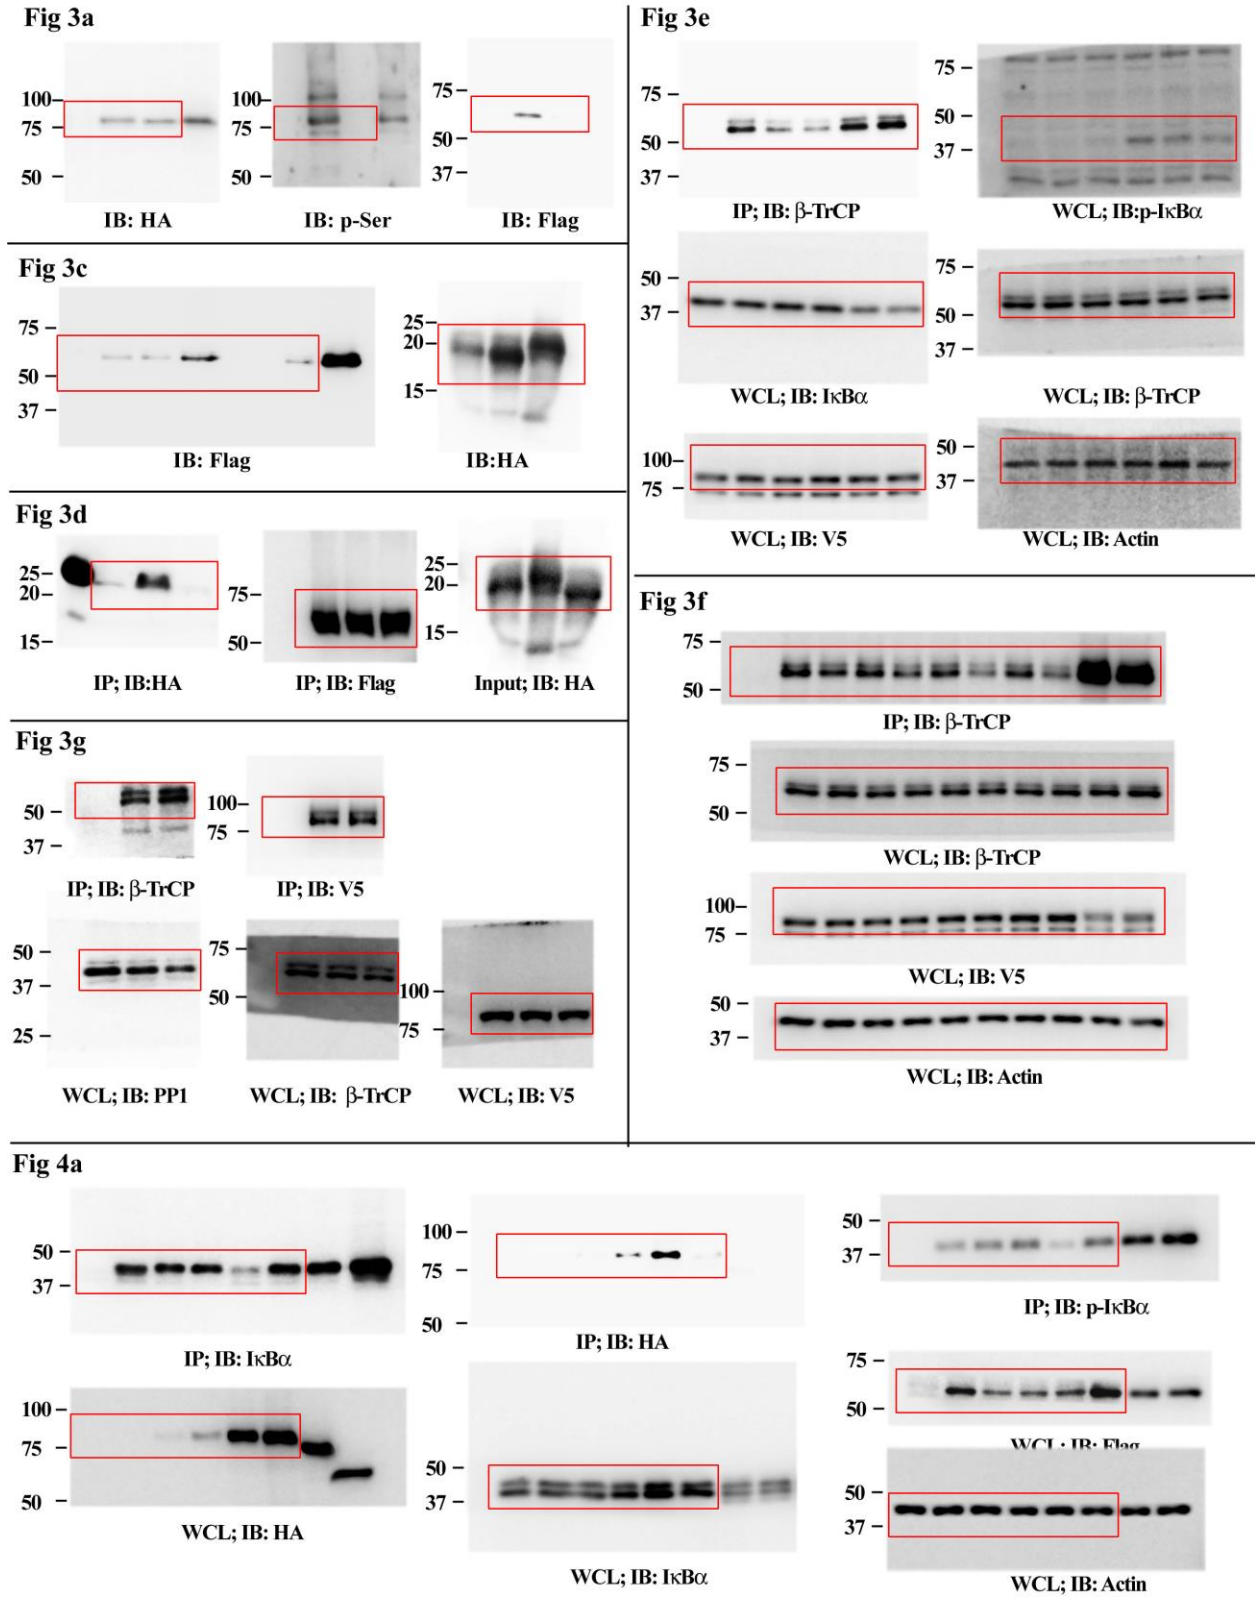

**Supplementary Figure 9 (Continued).**

Full scan image of the Western blots used in the manuscript for Fig 3 and Fig 4a.

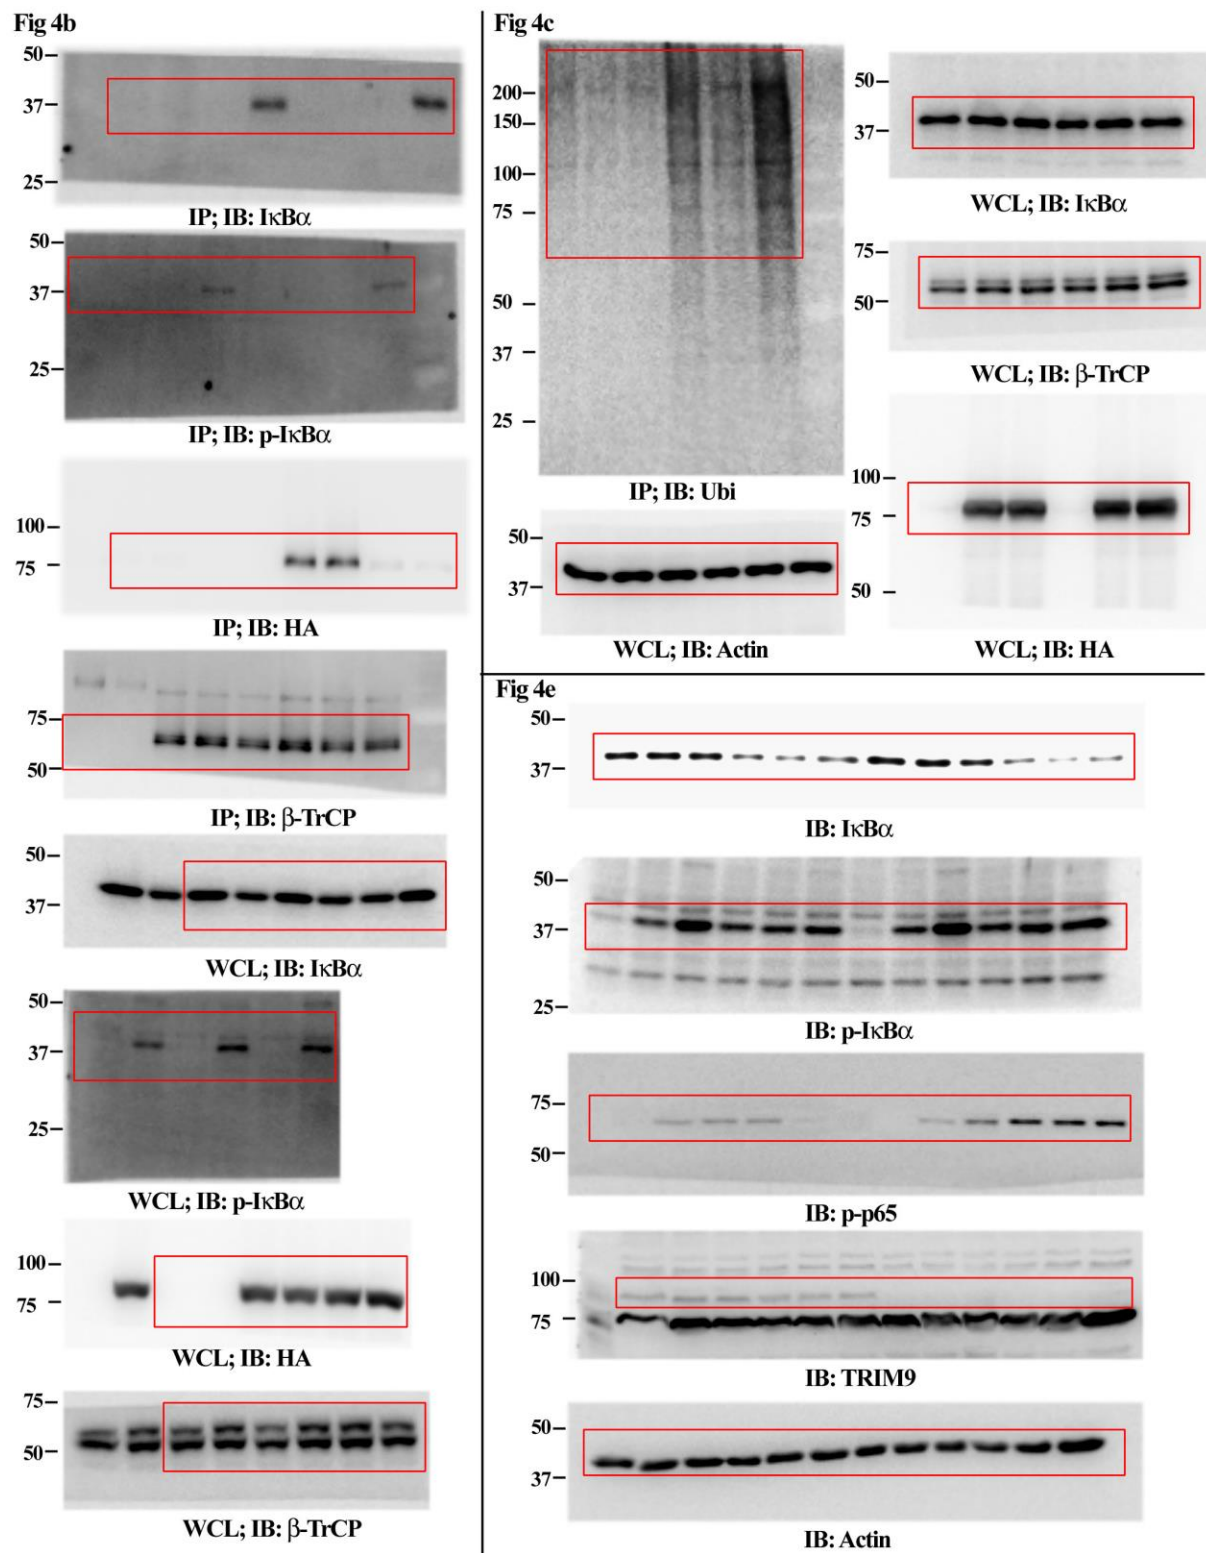

**Supplementary Figure 9 (Continued).**

Full scan image of the Western blots used in the manuscript for Fig 4b, c and e.

Fig4d

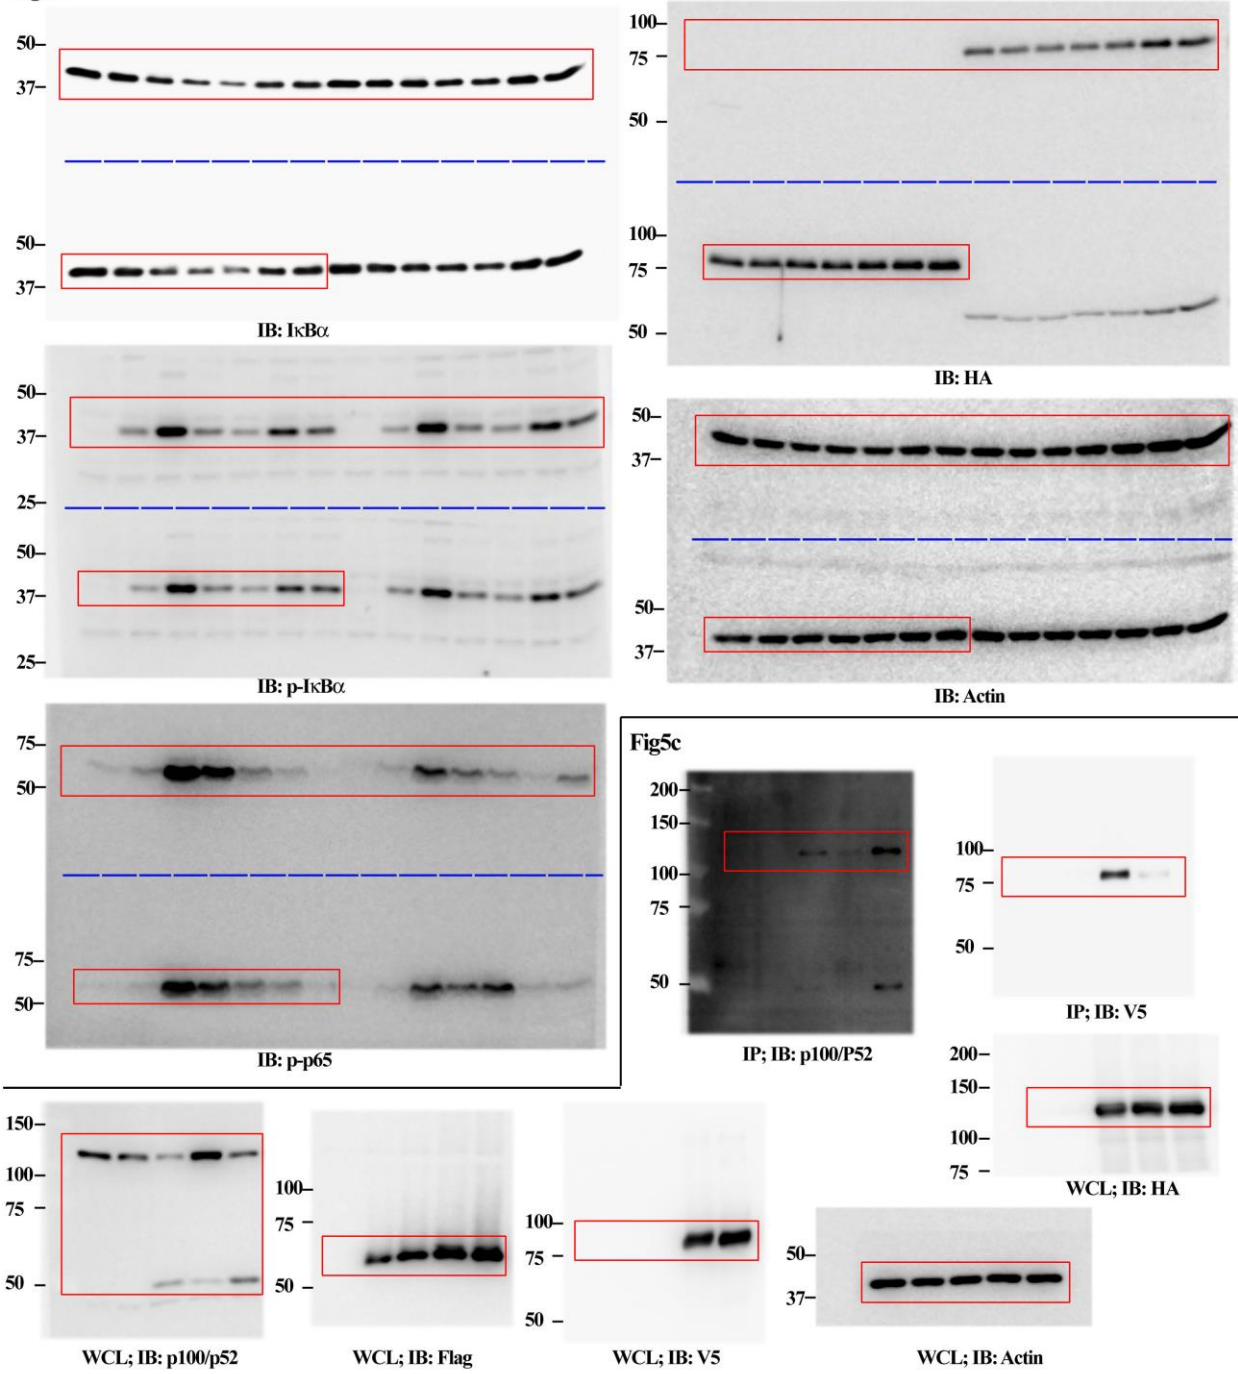

**Supplementary Figure 9 (Continued).**

Full scan image of the Western blots used in the manuscript for Fig 4d and Fig 5c.

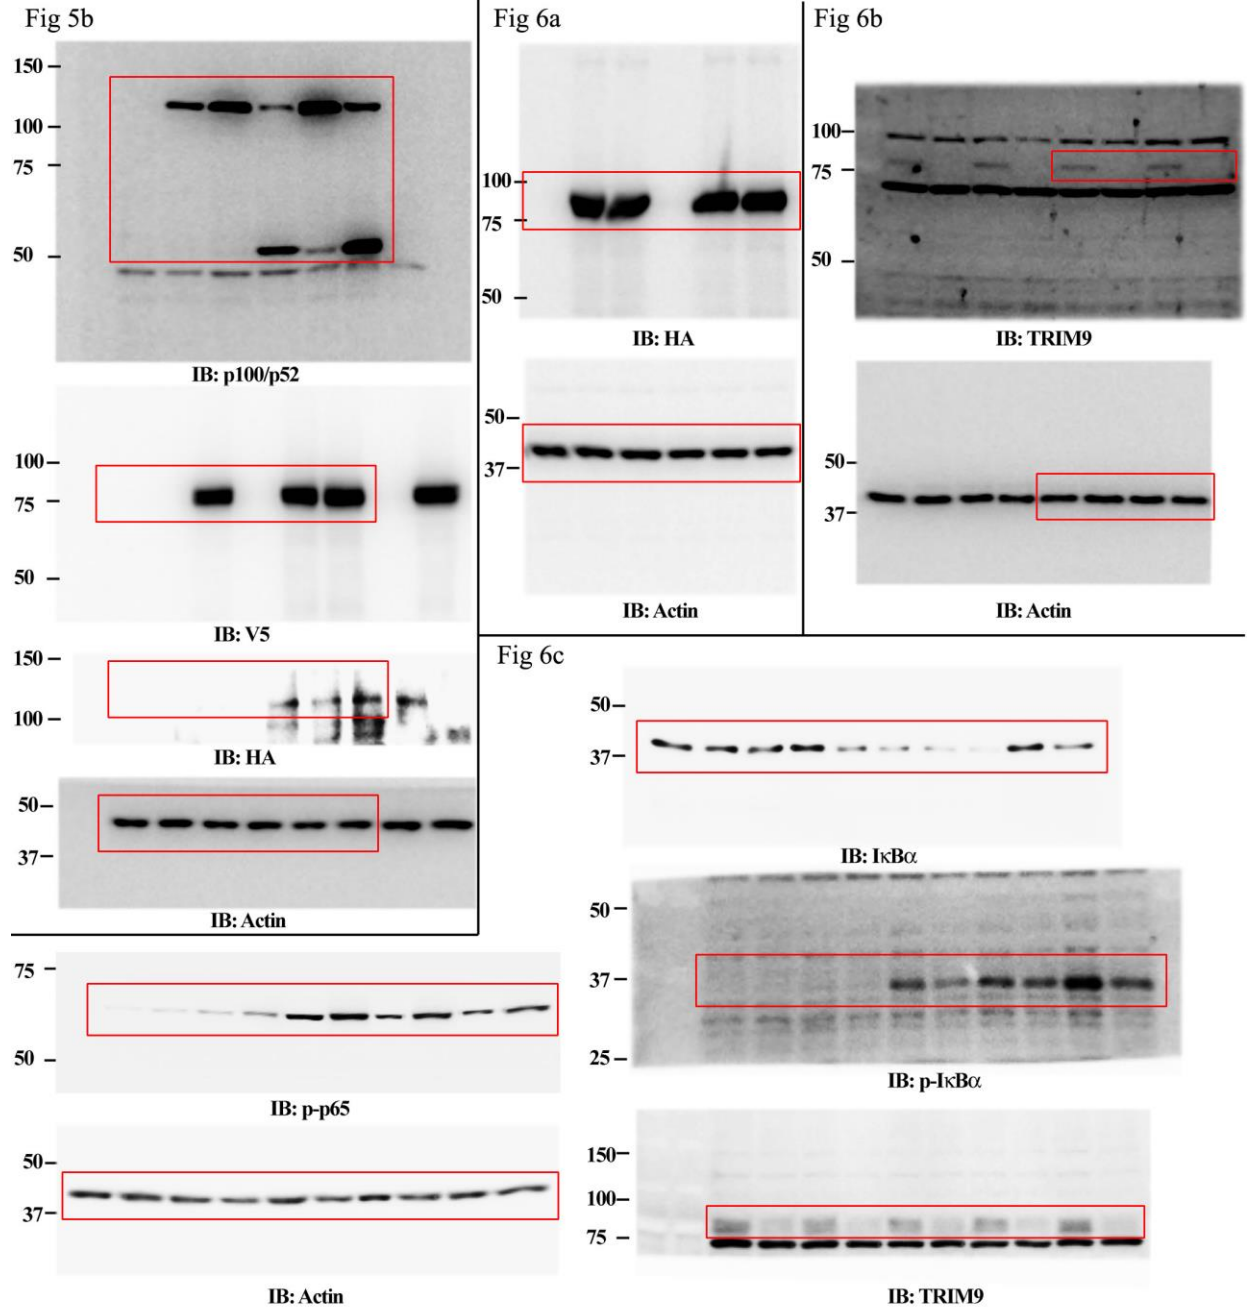

**Supplementary Figure 9 (Continued).**

Full scan image of the Western blots used in the manuscript for Fig 5b and Fig 6.

Supplementary Fig 3b

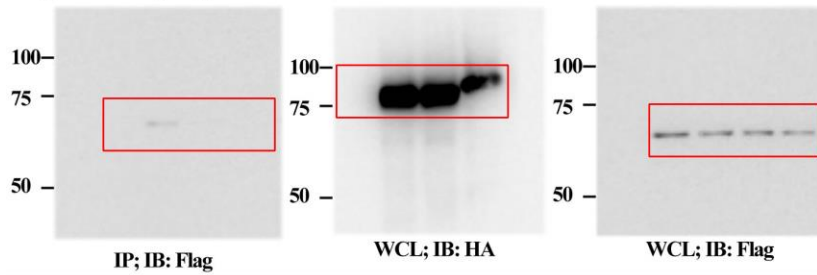

Supplementary Fig 4c

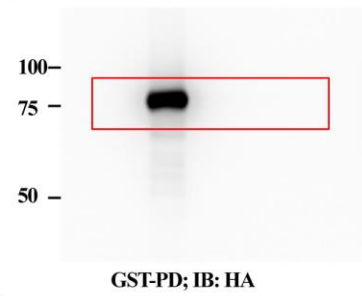

Supplementary Fig 4a

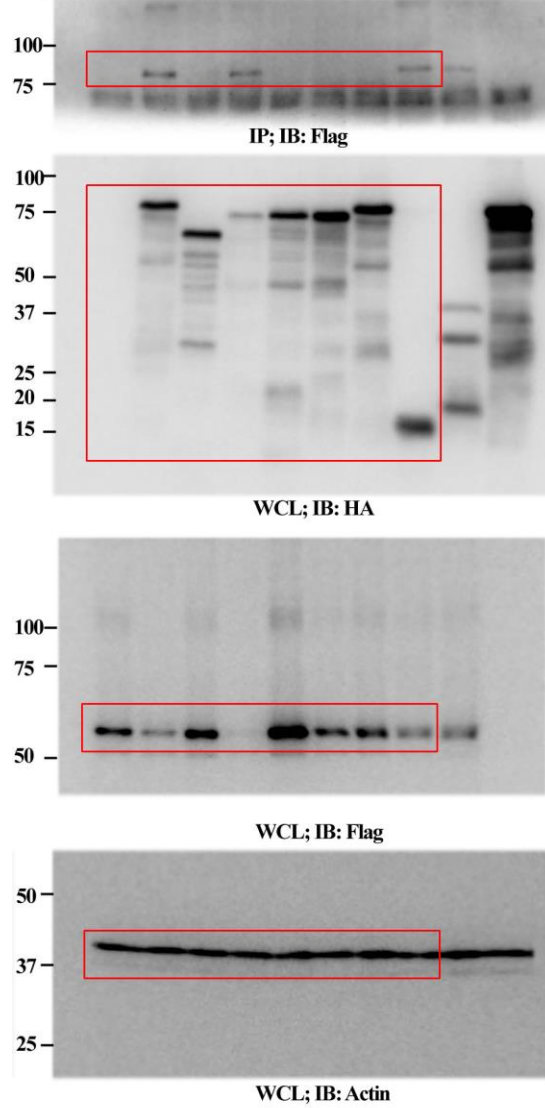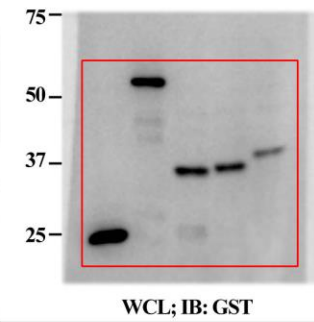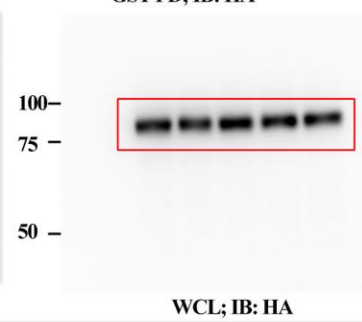

Supplementary Fig 5

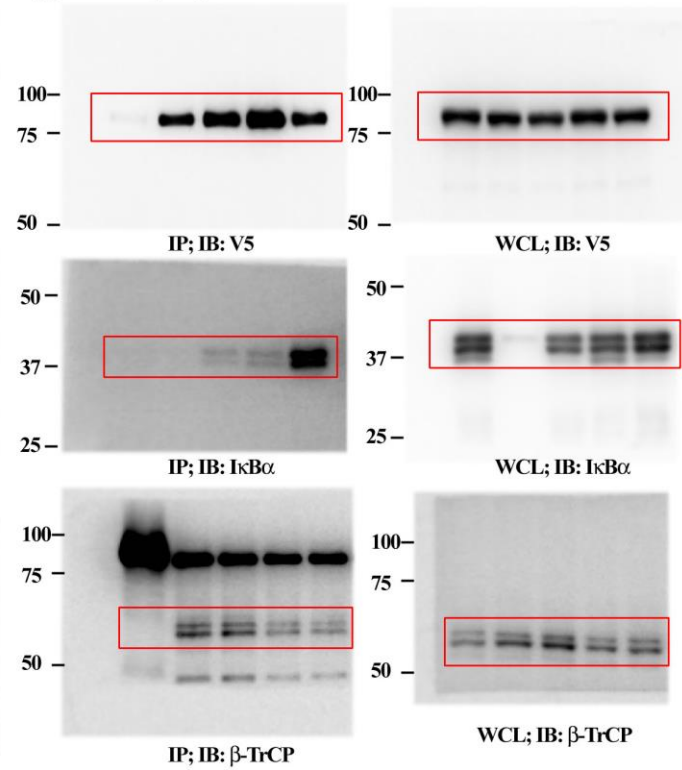

Supplementary Figure 9 (Continued).

Full scan image of the Western blots used in the manuscript for Supplementary Fig 3b, 4 and 5.

Supplementary Fig 6a

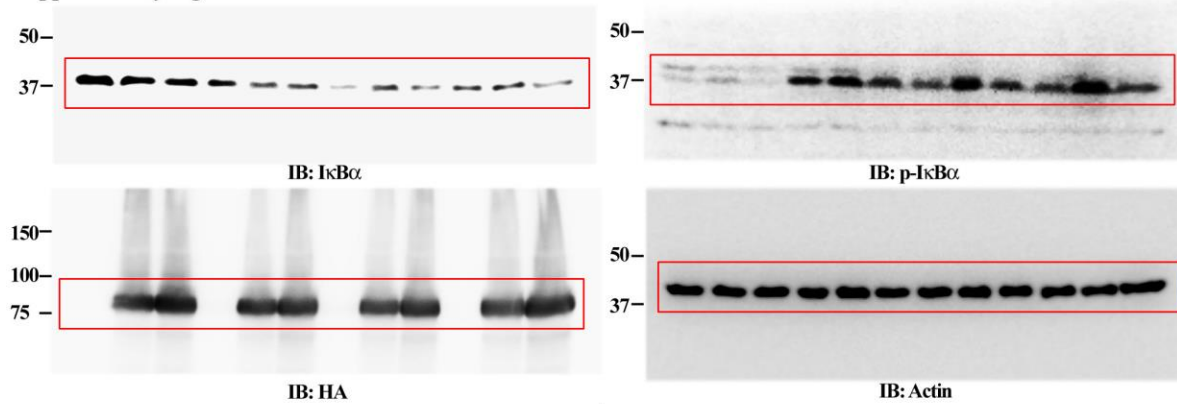

Supplementary Fig 6b

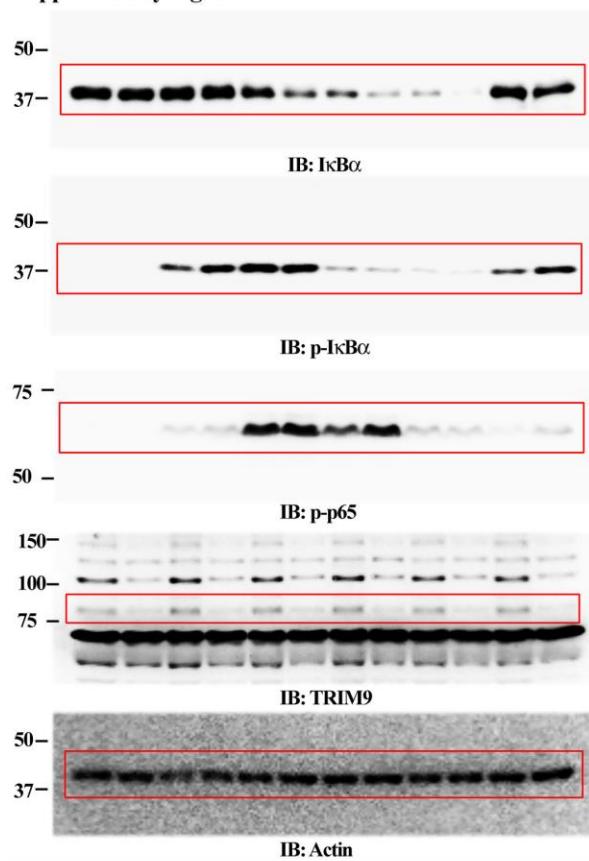

Supplementary Fig 6c

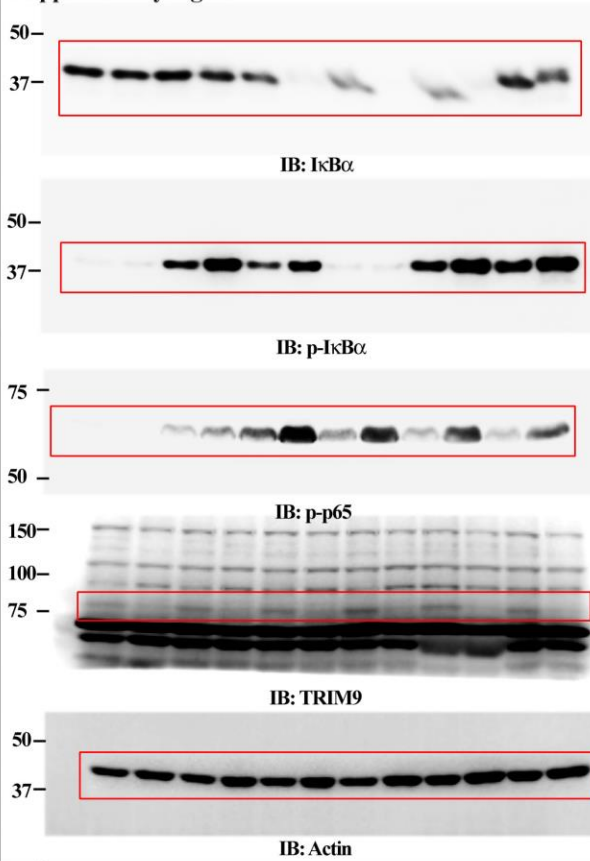

Supplementary Fig 7a

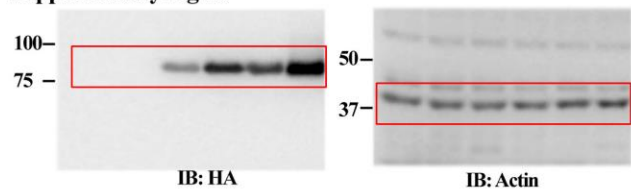

Supplementary Fig 7b

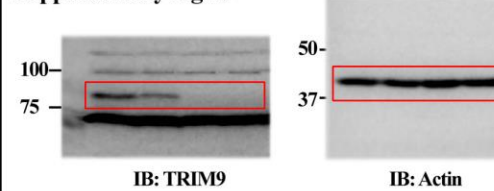

**Supplementary Figure 9 (Continued).**

Full scan image of the Western blots used in the manuscript for Supplementary Fig 6 and 7.
